# Supplementary material for: Assessment of the fecundity of deep-sea corals in southeastern Brazil
Source: PeerJ. 2025 Jun 3;13:e19525. doi: 10.7717/peerj.19525 (PMC12143285; doi:10.7717/peerj.19525)
Supplement: Supplemental Information 1 — All histologically processed samples, oocytes found per colony, calculated fecundity, and polyp volume were calculated. Samples were analyzed separately and together. [file peerj-13-19525-s001.xlsx]

## Sheet: Planilha1
ID	Collection date	Basin	Sp	Depth	Fertile	Cyst	Oocyte I	Oocyte II	Oocyte III	Oocyte total	Polyp volume mm3*	Fecunditity (Oocyte/mm³)
IEAPM002540	2016-09-03	BES	Desmophyllum pertusum	503	0	0	0	0	0	0	0	0
IEAPM002531	2016-09-02	BES	Desmophyllum pertusum	668	0	0	0	0	0	0	0	0
IEAPM002551	2016-09-04	BES	Enallopsammia rostrata	525	1	1	0	0	0	0	0	0
IEAPM002526	2016-09-02	BES	Enallopsammia rostrata	668	1	0	98	115	67	280	34.1911	2.73
IEAPM002516	2016-09-01	BES	Solenosmilia variabilis	934	0	1	0	0	0	0	0	0
IEAPM002547	2016-09-04	BES	Madrepora oculata	484	1	0	104	35	4	143	14.4244	3.3
IEAPM002554	2016-09-04	BES	Desmophyllum pertusum	456	0	0	0	0	0	0	0	0
IEAPM002523	2016-09-02	BES	Solenosmilia variabilis	656	1	1	0	0	0	0	0	0
IEAPM002553	2016-09-04	BES	Madrepora oculata	465	0	0	0	0	0	0	0	0
IEAPM002546	2016-09-03	BES	Enallopsammia rostrata	487	0	0	0	0	0	0	0	0
IEAPM002542	2016-09-03	BES	Enallopsammia rostrata	516	1	1	0	0	0	0	0	0
IEAPM002530	2016-09-02	BES	Solenosmilia variabilis	668	1	1	0	0	0	0	0	0
IEAPM002544	2016-09-03	BES	Desmophyllum pertusum	524	0	0	0	0	0	0	0	0
IEAPM002524	2016-09-02	BES	Enallopsammia rostrata	655	1	0	96	292	45	433	82.3475	1.75
IEAPM002543	2016-09-03	BES	Madrepora oculata	523	1	1	0	0	0	0	0	0
IEAPM002529	2016-09-02	BES	Solenosmilia variabilis	692	1	1	0	0	0	0	0	0
IEAPM002534	2016-09-02	BES	Desmophyllum pertusum	627	1	1	0	0	0	0	0	0
IEAPM002528	2016-09-02	BES	Desmophyllum pertusum	692	1	1	0	0	0	0	0	0
IEAPM002518	2016-09-01	BES	Solenosmilia variabilis	941	1	1	0	0	0	0	0	0
IEAPM002517	2016-09-01	BES	Solenosmilia variabilis	949	0	0	0	0	0	0	0	0
IEAPM002538	2016-09-03	BES	Desmophyllum pertusum	484	1	1	0	0	0	0	0	0
IEAPM002533	2016-09-02	BES	Solenosmilia variabilis	662	1	1	0	0	0	0	0	0
IEAPM002549	2016-09-04	BES	Madrepora oculata	505	1	0	250	170	101	521	14.1608	12.26
IEAPM002537	2016-09-03	BES	Desmophyllum pertusum	513	1	0	912	1256	592	2760	312.038	2.95
IEAPM002525	2016-09-02	BES	Solenosmilia variabilis	681	1	1	0	0	0	0	0	0
IEAPM002550	2016-09-04	BES	Enallopsammia rostrata	520	1	0	44	47	52	143	29.3689	1.62
IEAPM002522	2016-09-02	BES	Desmophyllum pertusum	657	1	1	0	0	0	0	0	0
IEAPM002512	2016-08-31	BES	Solenosmilia variabilis	931	0	0	0	0	0	0	0	0
IEAPM002513	2016-09-01	BES	Solenosmilia variabilis	939	1	1	0	0	0	0	0	0
IEAPM002539	2016-09-03	BES	Madrepora oculata	473	1	0	614	1406	643	2663	8.98136	99
IEAPM002515	2016-09-01	BES	Solenosmilia variabilis	938	1	0	234	624	998	1856	8.81049	70.22
IEAPM002521	2016-09-01	BES	Solenosmilia variabilis	948	1	0	85	24	69	178	9.83579	9.05
IEAPM002527	2016-09-02	BES	Solenosmilia variabilis	668	1	1	0	0	0	0	0	0
IEAPM002577	2016-09-07	BC	Desmophyllum pertusum	603	0	0	0	0	0	0	0	0
IEAPM002581	2016-09-07	BC	Madrepora oculata	596	1	1	0	0	0	0	0	0
IEAPM002584	2016-09-08	BC	Desmophyllum pertusum	592	0	0	0	0	0	0	0	0
IEAPM002585	2016-09-08	BC	Enallopsammia rostrata	601	1	0	58	58	186	302	41.0599	2.45
IEAPM002601	2016-09-09	BC	Enallopsammia rostrata	1128	0	0	0	0	0	0	0	0
IEAPM002583	2016-09-07	BC	Desmophyllum pertusum	572	1	1	0	0	0	0	0	0
IEAPM002566	2016-09-06	BC	Desmophyllum pertusum	657	0	0	0	0	0	0	0	0
IEAPM002604	2016-09-09	BC	Solenosmilia variabilis	1015	0	0	0	0	0	0	0	0
IEAPM002589	2016-09-08	BC	Enallopsammia rostrata	618	1	0	1	11	9	21	27.922	0.38
IEAPM002571	2016-09-07	BC	Madrepora oculata	624	1	0	216	198	45	459	16.9713	9.02
IEAPM002614	2016-09-10	BC	Enallopsammia rostrata	1124	1	0	7	31	8	46	29.045	0.53
IEAPM002582	2016-09-07	BC	Madrepora oculata	572	1	0	0	36	22	58	12.56	1.54
IEAPM002586	2016-09-08	BC	Solenosmilia variabilis	599	1	0	336	533	433	1302	30.4842	14.24
IEAPM002598	2016-09-09	BC	Solenosmilia variabilis	1127	1	0	387	923	319	1629	10.0306	54.13
IEAPM002608	2016-09-10	BC	Solenosmilia variabilis	875	1	1	0	0	0	0	0	0
IEAPM002607	2016-09-09	BC	Solenosmilia variabilis	970	1	0	45	58	16	119	16.2233	2.45
IEAPM002555	2016-09-06	BC	Enallopsammia rostrata	711	1	1	0	0	0	0	0	0
IEAPM002560	2016-09-06	BC	Madrepora oculata	665	0	0	0	0	0	0	0	0
IEAPM002605	2016-09-09	BC	Enallopsammia rostrata	999	1	0	237	152	30	419	45.1672	3.09
IEAPM002564	2016-09-06	BC	Solenosmilia variabilis	652	0	0	0	0	0	0	0	0
IEAPM002594	2016-09-08	BC	Solenosmilia variabilis	679	0	0	0	0	0	0	0	0
IEAPM002597	2016-09-09	BC	Solenosmilia variabilis	1122	1	1	0	0	0	0	0	0
IEAPM002600	2016-09-09	BC	Solenosmilia variabilis	1128	0	0	0	0	0	0	0	0
IEAPM002557	2016-09-06	BC	Enallopsammia rostrata	672	0	0	0	0	0	0	0	0
IEAPM002568	2016-09-06	BC	Madrepora oculata	629	1	1	0	0	0	0	0	0
IEAPM002592	2016-09-08	BC	Desmophyllum pertusum	613	0	0	0	0	0	0	0	0
IEAPM002593	2016-09-08	BC	Solenosmilia variabilis	612	1	0	5306	6261	898	12465	35.6874	116.43
IEAPM002603	2016-09-09	BC	Solenosmilia variabilis	1021	1	1	0	0	0	0	0	0
IEAPM002578	2016-09-07	BC	Madrepora oculata	595	1	1	0	0	0	0	0	0
IEAPM002596	2016-09-09	BC	Enallopsammia rostrata	1123	1	1	0	0	0	0	0	0
IEAPM002610	2016-09-10	BC	Solenosmilia variabilis	889	1	0	2066	4594	2688	9348	37.9207	82.17
IEAPM002556	2016-09-06	BC	Desmophyllum pertusum	677	0	0	0	0	0	0	0	0
IEAPM002559	2016-09-06	BC	Enallopsammia rostrata	669	1	0	121	229	281	631	23.4441	8.97
IEAPM002616	2016-09-10	BC	Enallopsammia rostrata	1127	1	0	157	140	36	333	33.4893	3.31
IEAPM002579	2016-09-07	BC	Solenosmilia variabilis	588	1	0	192	12	199	403	28.9684	4.64
IEAPM002670	2016-10-05	BS	Desmophyllum pertusum	208	0	0	0	0	0	0	0	0
IEAPM002661	2016-10-04	BS	Desmophyllum pertusum	484	1	0	0	60	72	132	55.7677	2.37
IEAPM002634	2016-10-02	BS	Enallopsammia rostrata	789	1	1	0	0	0	0	0	0
IEAPM002625	2016-09-30	BS	Solenosmilia variabilis	830	1	0	2726	2113	2449	7288	30.9966	78.37
IEAPM002639	2016-10-03	BS	Madrepora oculata	810	0	0	0	0	0	0	0	0
IEAPM002622	2016-09-30	BS	Solenosmilia variabilis	825	0	0	0	0	0	0	0	0
IEAPM002659	2016-10-04	BS	Madrepora oculata	478	0	0	0	0	0	0	0	0
IEAPM002617	2016-09-30	BS	Solenosmilia variabilis	850	0	0	0	0	0	0	0	0
IEAPM002638	2016-10-03	BS	Enallopsammia rostrata	811	1	1	0	0	0	0	0	0
IEAPM002666	2016-10-05	BS	Madrepora oculata	481	1	1	0	0	0	0	0	0
IEAPM002669	2016-10-05	BS	Desmophyllum pertusum	240	0	0	0	0	0	0	0	0
IEAPM002654	2016-10-04	BS	Madrepora oculata	533	1	0	18	127	57	202	1.13389	59.38
IEAPM002667	2016-10-05	BS	Desmophyllum pertusum	251	0	0	0	0	0	0	0	0
IEAPM002618	2016-10-04	BS	Desmophyllum pertusum	472	1	1	0	0	0	0	0	0
IEAPM002630	2016-10-01	BS	Madrepora oculata	892	1	1	0	0	0	0	0	0
IEAPM002631	2016-10-01	BS	Enallopsammia rostrata	890	1	1	0	0	0	0	0	0
IEAPM002629	2016-10-01	BS	Madrepora oculata	850	1	1	0	0	0	0	0	0
IEAPM002619	2016-09-30	BS	Solenosmilia variabilis	818	0	0	0	0	0	0	0	0
IEAPM002646	2016-10-03	BS	Desmophyllum pertusum	205	0	0	0	0	0	0	0	0
IEAPM002628	2016-10-01	BS	Solenosmilia variabilis	837	1	1	0	0	0	0	0	0
IEAPM002650	2016-10-04	BS	Madrepora oculata	532	1	1	0	0	0	0	0	0
IEAPM002651	2016-10-04	BS	Madrepora oculata	532	1	0	127	150	1	278	7.92806	11.69
IEAPM002636	2016-10-03	BS	Enallopsammia rostrata	819	1	0	54	50	0	104	27.7788	1.25
IEAPM002644	2016-10-03	BS	Desmophyllum pertusum	243	1	0	201	50	124	376	196.378	0.64
IEAPM002637	2016-10-03	BS	Enallopsammia rostrata	821	1	0	221	241	2	464	56.5446	2.74
IEAPM002624	2016-09-30	BS	Madrepora oculata	828	1	1	0	0	0	0	0	0
IEAPM002649	2016-10-04	BS	Desmophyllum pertusum	530	0	0	0	0	0	0	0	0
IEAPM002652	2016-10-04	BS	Desmophyllum pertusum	532	1	0	2985	17674	6386	27045	107.837	83.6
IEAPM002655	2016-10-04	BS	Desmophyllum pertusum	534	0	0	0	0	0	0	0	0
IEAPM002647	2016-10-04	BS	Desmophyllum pertusum	533	1	0	12752	8599	3182	24533	65.6262	124.61
IEAPM002645	2016-10-03	BS	Desmophyllum pertusum	206	1	0	404	534	53	991	46.8844	21.14
IEAPM002656	2016-10-04	BS	Madrepora oculata	530	1	0	13	26	8	47	1.49281	15.74
IEAPM002657	2016-10-04	BS	Desmophyllum pertusum	480	1	0	784	9805	768	11357	116.757	97.27
IEAPM002662	2016-10-04	BS	Madrepora oculata	485	1	1	0	0	0	0	0	0
IEAPM002667	2016-10-05	BS	Desmophyllum pertusum	251	0	0	0	0	0	0	0	0
IEAPM002632	2016-10-01	BS	Madrepora oculata	878	0	0	0	0	0	0	0	0
IEAPM 002520	2016-09-01	BES	Solenosmilia variabilis	943	1	0	379	389	212	980	22.7722	14.345
IEAPM002671	2017-05-27	BES	Desmophyllum pertusum	680	1	0	20922	21252	16037	58211	271.783	71.394
IEAPM002672	2017-05-27	BES	Desmophyllum pertusum	656	1	1	0	0	0	0	0	0
IEAPM002675	2017-05-29	BES	Desmophyllum pertusum	462	1	1	0	0	0	0	0	0
IEAPM 002677	2017-05-29	BES	Desmophyllum pertusum	508	1	0	8463	43226	14138	65827	271.783	77.8876
IEAPM002721	2017-05-29	BES	Madrepora oculata	522	1	1	0	0	0	0	0	0
IEAPM002680	2017-05-29	BES	Enallopsammia rostrata	486	0	0	0	0	0	0	0	0
IEAPM002681	2017-05-29	BES	Enallopsammia rostrata	522	1	0	1	0	0	1	29.5596	0.0338299
IEAPM002684	2017-05-28	BES	Solenosmilia variabilis	699	0	0	0	0	0	0	0	0
IEAPM002685	2017-05-27	BES	Solenosmilia variabilis	949	1	0	68	270	4147	4485	12.6844	117.862
IEAPM 002674	2017-05-28	BES	Desmophyllum pertusum	691	0	0	0	0	0	0	0	0
IEAPM 002850	2017-05-29	BES	Desmophyllum pertusum	640	1	1	0	0	45	45	304.199	0.1
IEAPM 002723	2017-05-29	BES	Madrepora oculata	490	1	1	0	0	0	0	0	0
IEAPM 002724	2017-05-29	BES	Madrepora oculata	494	1	1	0	0	0	0	0	0
IEAPM 002678	2017-05-27	BES	Enallopsammia rostrata	656	1	1	0	0	0	0	0	0
IEAPM 002686	2017-05-27	BES	Solenosmilia variabilis	657	0	0	0	0	0	0	0	0
IEAPM 002682	2017-05-31	BES	Enallopsammia rostrata	739	1	1	0	0	0	0	0	0
IEAPM 002683	2017-06-01	BES	Enallopsammia rostrata	736	1	1	0	0	0	0	0	0
IEAPM 002689	2017-05-27	BES	Solenosmilia variabilis	681	1	1	0	0	0	0	0	0
IEAPM 002691	2017-05-31	BES	Solenosmilia variabilis	737	1	1	0	0	0	0	0	0
IEAPM 002687	2017-05-27	BES	Solenosmilia variabilis	940	1	0	2154	2773	3256	8183	40.1697	67.9036
IEAPM 002688	2017-05-27	BES	Solenosmilia variabilis	938	1	0	390	389	898	1677	30.9351	18.0701
IEAPM 002690	2017-06-01	BES	Solenosmilia variabilis	736	1	0	2519	4082	2174	8775	14.5734	200.708
IEAPM 002676	2017-05-29	BES	Desmophyllum pertusum	512	1	0	5270	8180	51910	65360	595.946	36.5581
IEAPM 002679	2017-05-27	BES	Enallopsammia rostrata	668	1	0	169	158	24	351	31.6023	3.70227
IEAPM 002852	2017-05-28	BES	Desmophyllum pertusum	519	0	0	0	0	0	0	0	0
IEAPM 002286	2017-05-28	BES	Desmophyllum pertusum	509	0	0	0	0	0	0	0	0
IEAPM 002287	2017-05-28	BES	Desmophyllum pertusum	641	1	0	150	472	5584	6206	110.543	18.71
IEAPM 002288	2017-05-28	BES	Desmophyllum pertusum	656	1	1	0	0	0	0	0	0
IEAPM 002941	2017-05-29	BES	Desmophyllum pertusum	487	1	0	1542	25446	216078	241832	719.949	167.95
IEAPM 002673	2017-05-28	BES	Desmophyllum pertusum	662	1	0	2279	2642	2967	7888	280.339	14.0687
IEAPM 002703	2017-07-21	BC	Desmophyllum pertusum	669	0	0	0	0	0	0	0	0
IEAPM 002704	2017-07-21	BC	Desmophyllum pertusum	680	0	0	0	0	0	0	0	0
IEAPM 002706	2017-07-25	BC	Desmophyllum pertusum	602	0	0	0	0	0	0	0	0
IEAPM 002692	2017-07-20	BC	Enallopsammia rostrata	685	1	0	64	0	0	64	16.3687	3.90989
IEAPM 002693	2017-07-21	BC	Enallopsammia rostrata	674	1	1	45	0	0	45	44.8564	1.0032
IEAPM 002709	2017-07-22	BC	Madrepora oculata	648	1	0	95	131	51	277	8.26849	11.1669
IEAPM 002715	2017-07-21	BC	Solenosmilia variabilis	675	1	1	0	0	0	0	0	0
IEAPM 002716	2017-07-20	BC	Solenosmilia variabilis	708	1	1	0	0	0	0	0	0
IEAPM 002694	2017-07-26	BC	Enallopsammia rostrata	1122	1	1	0	0	0	0	0	0
IEAPM 002696	2017-07-25	BC	Enallopsammia rostrata	598	1	0	6	45	107	158	22.4601	2.3449
IEAPM002695	2017-07-22	BC	Enallopsammia rostrata	627	1	1	0	0	0	0	0	0
IEAPM002705	2017-07-22	BC	Desmophyllum pertusum	645	0	0	0	0	0	0	0	0
IEAPM002711	2017-07-22	BC	Madrepora oculata	625	1	1	7	0	0	7	29.3035	0.238879
IEAPM002712	2017-07-25	BC	Madrepora oculata	594	1	1	0	0	0	0	0	0
IEAPM002717	2017-07-20	BC	Solenosmilia variabilis	710	1	0	8	14	16	38	4.5844	2.76299
IEAPM002718	2017-07-21	BC	Solenosmilia variabilis	668	1	0	580	483	442	1505	17.5976	28.5077
IEAPM002697	2017-07-26	BC	Enallopsammia rostrata	618	1	0	185	149	0	334	44.8564	2.87013
IEAPM002698	2017-07-26	BC	Enallopsammia rostrata	1125	0	0	0	0	0	0	0	0
IEAPM002707	2017-07-26	BC	Desmophyllum pertusum	624	0	0	0	0	0	0	0	0
IEAPM002708	2017-07-25	BC	Desmophyllum pertusum	598	0	0	0	0	0	0	0	0
IEAPM002713	2017-07-26	BC	Madrepora oculata	594	1	1	0	0	0	0	0	0
IEAPM002719	2017-07-22	BC	Solenosmilia variabilis	620	1	1	0	0	0	0	0	0
IEAPM002916	2017-07-26	BC	Solenosmilia variabilis	619	1	1	0	0	0	0	0	0
IEAPM002701	2017-07-27	BC	Enallopsammia rostrata	998	1	1	0	0	0	0	0	0
IEAPM002702	2017-07-22	BC	Enallopsammia rostrata	628	0	0	0	0	0	0	0	0
IEAPM002908	2017-07-26	BC	Solenosmilia variabilis	1126	0	0	0	0	0	0	0	0
IEAPM002914	2017-07-27	BC	Solenosmilia variabilis	1127	1	1	0	0	0	0	0	0
IEAPM002904	2017-07-27	BC	Solenosmilia variabilis	996	0	0	0	0	0	0	0	0
IEAPM002906	2017-07-27	BC	Solenosmilia variabilis	994	1	1	0	0	0	0	0	0
IEAPM002907	2017-07-26	BC	Solenosmilia variabilis	874	1	0	232	405	800	1437	12.6834	37.7658
IEAPM002699	2017-07-27	BC	Enallopsammia rostrata	1126	1	0	45	78	2	125	30.9548	1.34605
IEAPM002714	2017-07-26	BC	Madrepora oculata	620	1	0	141	573	496	1210	15.3198	26.3276
IEAPM002710	2017-07-21	BC	Madrepora oculata	673	1	0	435	460	489	1384	12.4369	37.0938
IEAPM002700	2017-07-27	BC	Enallopsammia rostrata	1123	1	0	20	190	219	429	20.5529	6.96
IEAPM002918	2017-07-26	BC	Solenosmilia variabilis	876	1	0	754	527	878	2159	10.2134	70.4632
IEAPM002871	2017-07-21	BC	Desmophyllum pertusum	677	0	0	0	0	0	0	0	0
IEAPM002870	2017-07-26	BC	Desmophyllum pertusum	596	1	0	5380	9230	18020	32630	398.957	27.26
IEAPM002867	2017-07-22	BC	Desmophyllum pertusum	649	0	0	0	0	0	0	0	0
IEAPM002866	2017-07-26	BC	Desmophyllum pertusum	601	0	0	0	0	0	0	0	0
IEAPM002869	2017-07-25	BC	Desmophyllum pertusum	599	0	0	0	0	0	0	0	0
IEAPM002861	2017-07-25	BC	Desmophyllum pertusum	602	0	0	0	0	0	0	0	0
IEAPM002868	2017-07-26	BC	Desmophyllum pertusum	623	1	0	2490	2405	90	4985	248.817	6.68
IEAPM002865	2017-07-22	BC	Desmophyllum pertusum	645	0	0	0	0	0	0	0	0
IEAPM001588	2017-07-21	BC	Desmophyllum pertusum	684	0	0	0	0	0	0	0	0
IEAPM001584	2017-07-29	BC	Desmophyllum pertusum	531	1	1	0	0	0	0	0	0
IEAPM001566	2017-07-28	BS	Desmophyllum pertusum	240	0	0	0	0	0	0	0	0
IEAPM002926	2017-07-29	BS	Desmophyllum pertusum	534	0	0	0	0	0	0	0	0
IEAPM002933	2017-07-29	BS	Desmophyllum pertusum	242	0	0	0	0	0	0	0	0
IEAPM002929	2017-08-01	BS	Madrepora oculata	823	1	1	1	0	0	1	16.7859	0.0595737
IEAPM001572	2017-07-29	BS	Madrepora oculata	533	1	1	0	0	0	0	0	0
IEAPM002935	2017-07-30	BS	Solenosmilia variabilis	814	0	0	0	0	0	0	0	0
IEAPM002928	2017-07-30	BS	Solenosmilia variabilis	816	1	0	649	148	4576	5373	27.7976	64.4299
IEAPM002938	2017-08-01	BS	Enallopsammia rostrata	827	0	0	0	0	0	0	0	0
IEAPM001582	2017-07-29	BS	Desmophyllum pertusum	244	0	0	0	0	0	0	0	0
IEAPM002936	2017-07-29	BS	Desmophyllum pertusum	241	0	0	0	0	0	0	0	0
IEAPM002912	2017-07-29	BS	Madrepora oculata	528	0	0	0	0	0	0	0	0
IEAPM002919	2017-07-29	BS	Madrepora oculata	527	1	1	0	0	0	0	0	0
IEAPM002925	2017-07-30	BS	Solenosmilia variabilis	819	1	1	0	0	0	0	0	0
IEAPM002923	2017-07-30	BS	Solenosmilia variabilis	820	1	1	0	0	0	0	0	0
IEAPM002939	2017-08-01	BS	Enallopsammia rostrata	827	1	1	0	0	0	0	0	0
IEAPM002930	2017-07-28	BS	Desmophyllum pertusum	241	0	0	0	0	0	0	0	0
IEAPM002915	2017-07-29	BS	Madrepora oculata	529	1	1	0	0	0	0	0	0
IEAPM002922	2017-07-31	BS	Madrepora oculata	837	1	1	0	0	0	0	0	0
IEAPM002934	2017-08-01	BS	Enallopsammia rostrata	827	1	1	0	0	0	0	0	0
IEAPM002926	2017-07-29	BS	Desmophyllum pertusum	534	0	0	0	0	0	0	0	0
IEAPM001198	2017-07-29	BS	Desmophyllum pertusum	533	1	1	0	0	0	0	0	0
IEAPM002913	2017-07-29	BS	Desmophyllum pertusum	530	1	1	0	0	0	0	0	0
IEAPM002921	2017-08-01	BS	Solenosmilia variabilis	819	1	0	1357	2147	62	3566	25.3607	49.8704
IEAPM001569	2017-07-29	BS	Madrepora oculata	533	1	0	106	366	221	693	4.67869	46.5704
IEAPM002920	2017-07-29	BS	Desmophyllum pertusum	527	1	0	790	1289	1993	4072	62.3902	21.7555
IEAPM002905	2017-07-29	BS	Desmophyllum pertusum	531	1	0	1814	2120	2126	6060	27.9805	72.193
IEAPM002927	2017-08-01	BS	Enallopsammia rostrata	826	1	1	371	317	86	774	22.3301	11.5539
IEAPM002924	2017-08-01	BS	Solenosmilia variabilis	819	1	0	78	275	1070	1423	22.892	20.7205
IEAPM002725	2017-05-28	BS	Madrepora oculata	473	1	0	149	111	20	280	4.70459	19.8388
IEAPM001557	2017-07-29	BS	Desmophyllum pertusum	239	0	0	0	0	0	0	0	0
IEAPM001149	2017-07-28	BS	Desmophyllum pertusum	241	0	0	0	0	0	0	0	0
IEAPM001578	2017-07-29	BS	Desmophyllum pertusum	526	0	0	0	0	0	0	0	0
IEAPM001192	2017-07-29	BS	Desmophyllum pertusum	529	0	0	0	0	0	0	0	0
IEAPM001197	2017-07-29	BS	Desmophyllum pertusum	244	0	0	0	0	0	0	0	0
IEAPM001194	2017-07-29	BS	Desmophyllum pertusum	532	0	0	0	0	0	0	0	0
IEAPM001193	2017-07-29	BS	Desmophyllum pertusum	243	0	0	0	0	0	0	0	0
IEAPM001570	2017-07-29	BS	Desmophyllum pertusum	242	0	0	0	0	0	0	0	0
*Polyp volume mm3 is the average volume of the reproductive polyps of one fragment
